# Supplementary material for: Pre-Pregnancy Diet and Vaginal Environment in Caucasian Pregnant Women: An Exploratory Study
Source: PubMed Central journal article supplement (PMC8356051; doi:10.3389/fmolb.2021.702370), 2021-07-28

## *Supplementary Material*

**Supplementary Table S1. Set of reference values used to assess energy and nutrient intakes of the study population.**

| <b>Dietary variables</b>                      | <b>Dietary reference values (DRVs)</b>                                                             | <b>Type of DRV</b> | <b>Source</b>      |
|-----------------------------------------------|----------------------------------------------------------------------------------------------------|--------------------|--------------------|
| Energy                                        | 18–29 y: 7.9 (PAL=1.4) – 9<br>(PAL=1.6) MJ/day<br>30–39 y: 7.6 (PAL=1.4) – 8.7<br>(PAL=1.6) MJ/day | AR                 | (EFSA,<br>2017)    |
| <b>Macronutrients</b>                         |                                                                                                    |                    |                    |
| Total carbohydrates                           | 45–60 E%                                                                                           | RI                 | (EFSA,<br>2017)    |
| Sugars (monosaccharides<br>and disaccharides) | <10 E%                                                                                             | RI                 | (WHO/FAO,<br>2003) |
| Dietary fiber                                 | 25 g/day                                                                                           | AI                 | (EFSA,<br>2017)    |
| Protein                                       | 0.66 – 0.83 g per kg BW per day                                                                    | AR – PRI           | (EFSA,<br>2017)    |
| Total fat                                     | 20–35 E%                                                                                           | RI                 | (EFSA,<br>2017)    |
| Saturated fatty acids (SFA)                   | <10 E%                                                                                             | RI                 | (FAO, 2010)        |
| Monounsaturated fatty<br>acids (MUFA)         | 15–20 E%                                                                                           | RI                 | (FAO, 2010)        |
| Polyunsaturated fatty acids<br>(PUFA)         | 6–11 E%                                                                                            | RI                 | (FAO, 2010)        |
| $\alpha$ -linolenic acid (ALA)                | 0.5 E%                                                                                             | AI                 | (EFSA,<br>2017)    |
| Linoleic acid (LA)                            | 4 E%                                                                                               | AI                 | (EFSA,<br>2017)    |
| <b>Minerals</b>                               |                                                                                                    |                    |                    |
| Calcium                                       | 18–24 y: 1000 mg/day<br>$\geq$ 25 y: 950 mg/day                                                    | PRI                | (EFSA,<br>2017)    |
| Iron                                          | 16 mg/day                                                                                          | PRI                | (EFSA,<br>2017)    |
| Phosphorus                                    | 550 mg/day                                                                                         | AI                 | (EFSA,<br>2017)    |
| Potassium                                     | 3500 mg/day                                                                                        | AI                 | (EFSA,<br>2017)    |

|                           |                            |                          |              |
|---------------------------|----------------------------|--------------------------|--------------|
| Sodium                    | 2 g/day                    | Safe and adequate intake | (EFSA, 2017) |
| Zinc                      | LPI 600 mg/day: 9.3 mg/day | PRI                      | (EFSA, 2017) |
| <b>Vitamins</b>           |                            |                          |              |
| Thiamin                   | 0.1 mg/MJ                  | PRI                      | (EFSA, 2017) |
| Riboflavin                | 1.6 mg/day                 | PRI                      | (EFSA, 2017) |
| Niacin                    | 1.6 mg NE/MJ               | PRI                      | (EFSA, 2017) |
| Vitamin B <sub>6</sub>    | 1.6 mg/day                 | PRI                      | (EFSA, 2017) |
| Folate                    | 330 µg DFE/day             | PRI                      | (EFSA, 2017) |
| Vitamin C                 | 95 mg/day                  | PRI                      | (EFSA, 2017) |
| Vitamin A                 | 650 µg RE/day              | PRI                      | (EFSA, 2017) |
| Vitamin E as α-tocopherol | 11 mg/day                  | AI                       | (EFSA, 2017) |
| Vitamin D                 | 15 µg/day                  | AI                       | (EFSA, 2017) |

Abbreviations: AI, adequate intake; AR: average requirement; BW, body weight; DFE, dietary folate equivalents; DRVs, dietary reference values; E%, percentage of energy intake; LPI, level of phytate intake; MJ, megajoule (1 MJ = 238.83 kcal); NE, niacin equivalent; PAL, physical activity level (1.4 low active, sedentary lifestyle; 1.6 moderately active lifestyle); PRI, population reference intake; RE, retinol equivalents; RI, reference intake range for macronutrients; y, years.

#### References:

- EFSA (2017). Dietary reference values for nutrients Summary report. *EFSA Supporting Publications* 14, e15121E.
- FAO (2010). Fats and fatty acids in human nutrition. Report of an expert consultation. *FAO Food and Nutrition Paper* 91, 1-166.
- WHO/FAO (2003). *Diet, nutrition and the prevention of chronic diseases: Report of a joint WHO/FAO expert consultation*. Geneva, Switzerland: World Health Organization.

**Supplementary Table S2. Prevalence of underweight, normal weight, overweight, and obesity in the study population based on self-reported pre-pregnancy body weight and height measurements.**

|                       | <b>Median BMI<br/>(IQR)<br/>kg/m<sup>2</sup></b> | <b>Underweight<br/>(n)</b> | <b>Normal<br/>weight<br/>(n)</b> | <b>Overweight<br/>(n)</b> | <b>Obese<br/>(n)</b> |
|-----------------------|--------------------------------------------------|----------------------------|----------------------------------|---------------------------|----------------------|
| Age 20–29 y<br>(n=11) | 22.04 (21.15–<br>22.40) kg/m <sup>2</sup>        | 1                          | 9                                | 1                         | 0                    |
| Age 30–39 y<br>(n=13) | 22.76 (21.64–<br>26.84) kg/m <sup>2</sup>        | 0                          | 8                                | 5                         | 0                    |

Abbreviations: BMI, body mass index; IQR, interquartile range; y, years.

**Supplementary Table S3. Pre-pregnancy median intakes of energy, nutrients, and alcohol in the study population and their comparison to the reference values (as reported in Supplementary Table S1).** Significant differences with reference values are marked in bold.

| Dietary variables      | Value <sup>†</sup>                   | P-value <sup>‡</sup> |
|------------------------|--------------------------------------|----------------------|
| Energy                 | 8.05 (6.73–9.72) MJ/day              | 0.6900               |
| Total carbohydrates    | 47.14 (41.18–51.82) E%               | <b>&lt;0.001</b>     |
| Sugars                 | 21.00 (16.93–23.04) E%               | <b>&lt;0.001</b>     |
| Dietary fiber          | 17.98 (13.79–22.16) g/day            | <b>&lt;0.001</b>     |
| Protein                | 75.04 (68.94–83.31) g/day            | <b>&lt;0.001</b>     |
| Total fat              | 37.75 (35.12–40.47) E%               | <b>&lt;0.001</b>     |
| SFA                    | 11.53 (10.34–12.35) E%               | <b>&lt;0.001</b>     |
| MUFA                   | 17.86 (15.53–18.75) E%               | 0.7400               |
| PUFA                   | 5.37 (4.46–6.17) E%                  | <b>&lt;0.0001</b>    |
| ALA                    | 0.45 (0.40–0.52) E%                  | <b>0.0469</b>        |
| LA                     | 4.10 (3.53–5.04) E%                  | 0.2864               |
| Calcium                | 710.25 (575.26–832.43)<br>mg/day     | <b>0.0002</b>        |
| Iron                   | 10.21 (8.52–11.35) mg/day            | <b>&lt;0.0001</b>    |
| Phosphorus             | 1226.31 (1100.95–1346.06)<br>mg/day  | <b>&lt;0.0001</b>    |
| Potassium              | 3146.39 (2401.40–3296.50)<br>mg/day  | <b>&lt;0.001</b>     |
| Sodium                 | 2088.30 (1894.28–2372.93)<br>mg/day  | 0.3600               |
| Zinc                   | 9.86 (8.71–10.84) mg/day             | 0.4056               |
| Thiamin                | 0.93 (0.83–1.24) mg/day              | <b>0.0255</b>        |
| Riboflavin             | 1.51 (1.34–1.65) mg/day              | 0.1400               |
| Niacin                 | 20.39 (16.19–25.35) mg<br>NE/day     | <b>&lt;0.0001</b>    |
| Vitamin B <sub>6</sub> | 1.92 (1.52–2.24) mg/day              | <b>0.0027</b>        |
| Folate                 | 262.18 (209.69–297.40) µg<br>DFE/day | <b>&lt;0.001</b>     |
| Vitamin C              | 113.42 (86.81–142.21) mg/day         | <b>0.0300</b>        |
| Vitamin A              | 794.96 (628.47–920.25) µg<br>RE/day  | <b>0.006</b>         |
| Vitamin E              | 12.43 (10.53–15.80) mg/day           | <b>0.0269</b>        |
| Vitamin D              | 2.66 (2.34–3.90) µg/day              | <b>&lt;0.001</b>     |
| Alcohol                | 3.64 (0.95–9.94) g/day               | <b>0.0366</b>        |

Abbreviations: ALA,  $\alpha$ -linolenic acid; DFE, dietary folate equivalents; E%, percentage of energy intake; LA, linoleic acid; MUFA, monounsaturated fatty acids; NE, niacin equivalent; PUFA, polyunsaturated fatty acids; RE, retinol equivalents; SFA, saturated fatty acids.

<sup>†</sup> median with interquartile range (Q1 to Q3).

<sup>‡</sup> p values from Student's t-test for normally distributed variables (energy, total carbohydrates, sugars, dietary fiber, protein, total fat, SFA, MUFA, ALA, iron, potassium, sodium, zinc, thiamin, niacin, vitamin B<sub>6</sub>, folate, vitamin C, vitamin D) and Mann-Whitney U test for non-normally distributed variables (PUFA, LA, calcium, phosphorus, riboflavin, vitamin A, vitamin E, alcohol).

**Supplementary Table S4. Pre-pregnancy adequacy of dietary intake of the study population in comparison to the reference values.**

| <b>Dietary variables</b> | <b>Adequate intake<br/>n (%)</b> | <b>Low intake<br/>n (%)</b> | <b>Excessive intake<br/>n (%)</b> |
|--------------------------|----------------------------------|-----------------------------|-----------------------------------|
| Energy                   | 6 (25%)                          | 10 (42%)                    | 8 (33%)                           |
| Total carbohydrates      | 17 (71%)                         | 7 (29%)                     | 0 (0%)                            |
| Sugars                   | 0 (0%)                           | --                          | 24 (100%)                         |
| Dietary fiber            | 3 (13%)                          | 21 (88%)                    | --                                |
| Protein                  | 3 (13%)                          | 0 (0%)                      | 21 (88%)                          |
| Total fat                | 6 (25%)                          | 0 (0%)                      | 18 (75%)                          |
| SFA                      | 5 (21%)                          | 0 (0%)                      | 19 (79%)                          |
| MUFA                     | 17 (71%)                         | 5 (21%)                     | 2 (8%)                            |
| PUFA                     | 7 (29%)                          | 17 (71%)                    | 0 (0%)                            |
| ALA                      | 8 (33%)                          | 16 (67%)                    | 0 (0%)                            |
| LA                       | 13 (54%)                         | 11 (46%)                    | 0 (0%)                            |
| Calcium                  | 2 (8%)                           | 22 (92%)                    | --                                |
| Iron                     | 0 (0%)                           | 24 (100%)                   | --                                |
| Phosphorus               | 24 (100%)                        | 0 (0%)                      | --                                |
| Potassium                | 1 (4%)                           | 23 (96%)                    | --                                |
| Sodium                   | 10 (42%)                         | --                          | 14 (58%)                          |
| Zinc                     | 14 (58%)                         | 10 (42%)                    | --                                |
| Thiamin                  | 15 (63%)                         | 9 (38%)                     | --                                |
| Riboflavin               | 8 (33%)                          | 16 (67%)                    | --                                |
| Niacin                   | 24 (100%)                        | 0 (0%)                      | --                                |
| Vitamin B <sub>6</sub>   | 16 (67%)                         | 8 (33%)                     | --                                |
| Folate                   | 3 (13%)                          | 21 (88%)                    | --                                |
| Vitamin C                | 17 (71%)                         | 7 (29%)                     | --                                |
| Vitamin A                | 17 (71%)                         | 7 (29%)                     | --                                |
| Vitamin E                | 15 (63%)                         | 9 (38%)                     | --                                |
| Vitamin D                | 0 (0%)                           | 24 (100%)                   | --                                |
| Alcohol                  | 19 (79%)                         | --                          | 5 (21%)                           |

**Supplementary Table S5. Prevalence of low, moderate, and high adherence to a Mediterranean-type diet before pregnancy in the study population.**

|                       | <b>Median MEDI-LITE score (IQR)</b> | <b>Low adherence (n) †</b> | <b>Moderate adherence (n) †</b> | <b>High adherence (n) †</b> |
|-----------------------|-------------------------------------|----------------------------|---------------------------------|-----------------------------|
| Age 20–29 y<br>(n=11) | 10.00 (9.50–11.50)                  | 2                          | 8                               | 1                           |
| Age 30–39 y<br>(n=13) | 10.00 (8.00–13.00)                  | 0                          | 9                               | 4                           |

Abbreviations: IQR, interquartile range; y, years.

† Low adherence range 0–6; moderate adherence range 7–12; high adherence range 13–18.

**Supplementary Table S6. List of the main pre-pregnancy anthropometric and dietary data for which a correlation with vaginal health status (Nugent score) during pregnancy was investigated.** Correlations were searched by calculating Spearman correlation coefficient (r) after correction for multiple comparisons (i.e., Bonferroni-Holm correction). Significant differences with reference values are marked in bold.

| Parameter                  | r            | <i>P-value</i> |
|----------------------------|--------------|----------------|
| <b>BMI</b>                 | <b>0.43</b>  | <b>0.034</b>   |
| <b>Animal protein</b>      | <b>0.42</b>  | <b>0.039</b>   |
| <b>Total carbohydrates</b> | <b>-0.42</b> | <b>0.041</b>   |
| <b>Sugars</b>              | <b>-0.41</b> | <b>0.046</b>   |
| Alcohol                    | 0.40         | 0.055          |
| Calcium                    | 0.38         | 0.068          |
| Riboflavin                 | 0.36         | 0.083          |
| Phosphorus                 | 0.34         | 0.105          |
| MUFA                       | 0.32         | 0.133          |
| Total fat                  | 0.30         | 0.160          |
| Carotene                   | 0.28         | 0.188          |
| Total protein              | 0.26         | 0.215          |
| PUFA                       | -0.26        | 0.221          |
| LA                         | -0.26        | 0.226          |
| Zinc                       | 0.23         | 0.279          |
| Vitamin D                  | -0.18        | 0.402          |
| Potassium                  | 0.16         | 0.452          |
| Vitamin B <sub>6</sub>     | 0.16         | 0.457          |
| Oleic acid                 | 0.16         | 0.464          |
| Cholesterol                | -0.15        | 0.484          |
| Folate                     | 0.14         | 0.507          |
| Niacin                     | 0.14         | 0.508          |
| Dietary fiber              | 0.14         | 0.525          |
| Iron                       | 0.14         | 0.525          |
| Vitamin C                  | 0.12         | 0.580          |
| ALA                        | 0.10         | 0.630          |
| SFA                        | 0.09         | 0.676          |
| Vitamin A                  | 0.08         | 0.693          |
| Thiamin                    | 0.08         | 0.694          |
| Vitamin E                  | 0.05         | 0.822          |
| Sodium                     | 0.04         | 0.851          |
| Plant protein              | 0.04         | 0.861          |
| Energy                     | 0.02         | 0.937          |
| MEDI-LITE score            | -0.01        | 0.952          |



**Supplementary Figure S1. Portions of  $^1\text{H-NMR}$  spectra, representative of all the spectra obtained in this study. The name of each molecule appears over the signal employed to quantify it. To optimize the visualization of each portion, a different spectrum with a convenient signal-to-noise ratio was selected.**

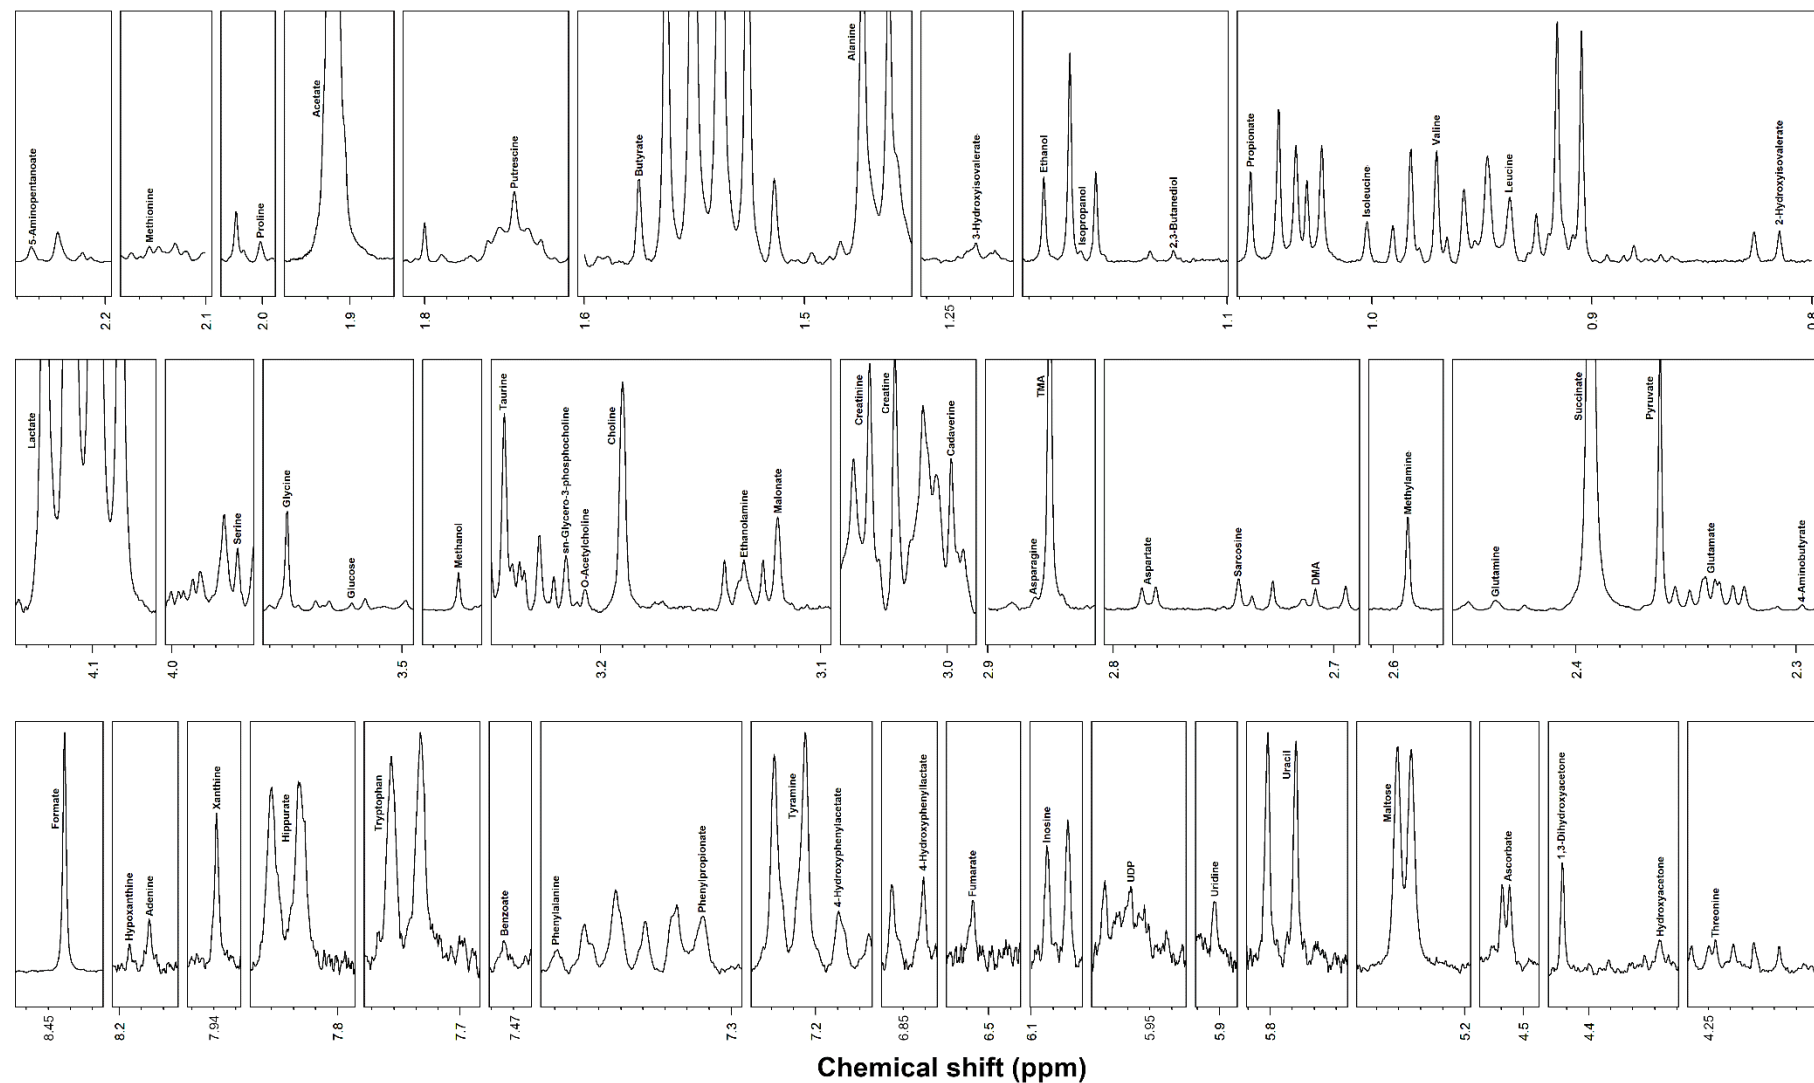

Supplement: DataSheet1.pdf [file DataSheet1.pdf]
